# Supplementary material for: Metabolic regulation of α-linolenic acid on β-carotene synthesis in Blakeslea trispora revealed by a GC-MS-based metabolomic approach
Source: Royal Society of Chemistry journal article supplement (doi:10.1039/c5ra08748a), 2015-01-01
Supplement: c5ra08748a1.pdf [file c5ra08748a1.pdf]

Figure S1 Scheme of the carotenoid biosynthesis pathway in *B. trispora*.

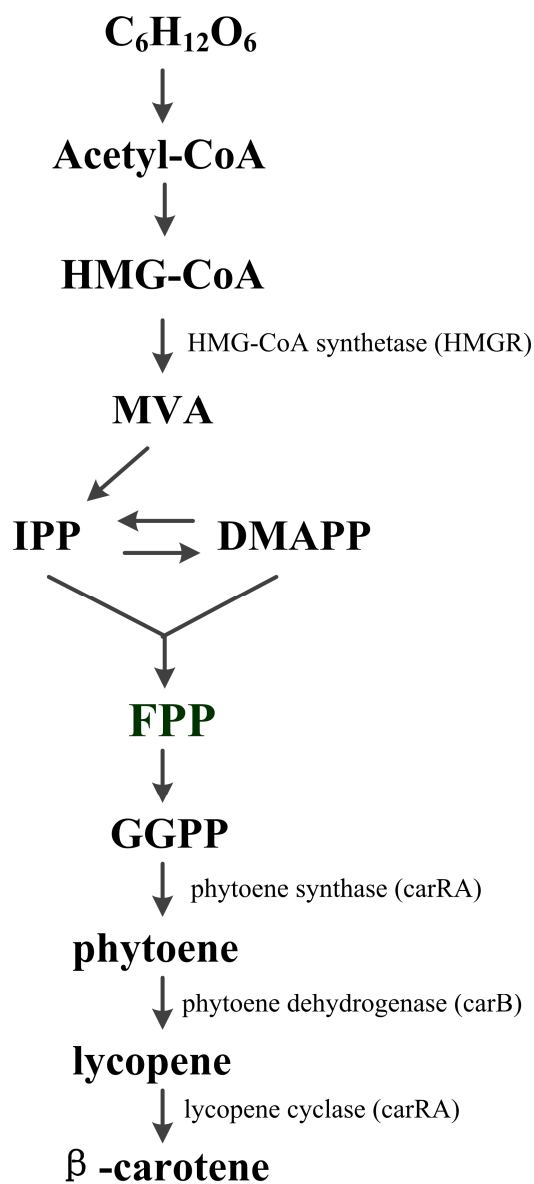

Table S1

Statistical data from PLS-DA at different time points in control and ALA-treated groups in *B. trispora*

| Sample                                  | R <sup>2</sup> X (cum) | R <sup>2</sup> Y (cum) | Q <sup>2</sup> (cum) |
|-----------------------------------------|------------------------|------------------------|----------------------|
| Control versus ALA-treated group at 36h | 0.842                  | 0.976                  | 0.948                |
| Control versus ALA-treated group at 48h | 0.872                  | 0.991                  | 0.956                |
| Control versus ALA-treated group at 72h | 0.976                  | 1.000                  | 0.978                |

Table S2

Real-time PCR primes used in this study.

| Genes   | Forward and reverse primers (5' → 3') | Amplicon length (bp) |
|---------|---------------------------------------|----------------------|
| tef 1-F | AACTCGGTAAGGGTTCCTTCAAG               | 138                  |
| tef 1-R | CGGGAGCATCAATAACGGTAAC                |                      |
| ACC-F   | TTGAAGGCCAATGCTGAATA                  | 183                  |
| ACC-R   | GCAAGCATCTCAGGCAAACG                  |                      |
| HMGR-F  | AAACGATGGATTGAACAAGAGGG               | 113                  |
| HMGR-R  | TAGACTAGACGACCGCAAGAGC                |                      |
| carRA-F | CCGTTTCACTCACAGCAAGA                  | 135                  |
| carRA-R | GACAGCCACAACACAAGTAGGA                |                      |
| carB-F  | AGACCTAGTACCAAGGATTCCACAA             | 92                   |
| carB-R  | AGAACGATAGGAACACCAGTACCTG             |                      |

Table S3

List of the intracellular differential metabolites identified by GC-MS.

| Retention time | Metabolite                 | 36h             |               | 48h             |               | 72h             |               |
|----------------|----------------------------|-----------------|---------------|-----------------|---------------|-----------------|---------------|
|                |                            | ALA             | Control       | ALA             | Control       | ALA             | Control       |
| 4.424          | Alanine                    | 0.080 ± 0.025** | 0.295 ± 0.049 | 0.029 ± 0.007** | 0.062 ± 0.013 | 0.027 ± 0.003   | 0.051 ± 0.046 |
| 6.660          | Phosphoric acid            | 0.475 ± 0.088** | 1.018 ± 0.156 | 0.464 ± 0.080   | 0.602 ± 0.340 | 0.430 ± 0.070   | 0.597 ± 0.196 |
| 6.708          | Glycerol                   | 0.080 ± 0.015** | 0.451 ± 0.147 | 0.122 ± 0.138   | 0.103 ± 0.150 | 0.351 ± 0.175   | 0.134 ± 0.148 |
| 7.143          | Glycine                    | 0.046 ± 0.013** | 0.115 ± 0.023 | 0.030 ± 0.007** | 0.044 ± 0.004 | 0.023 ± 0.004   | 0.029 ± 0.010 |
| 8.184          | Threonine                  | 0.044 ± 0.010** | 0.072 ± 0.015 | 0.027 ± 0.005** | 0.048 ± 0.003 | 0.028 ± 0.005   | 0.026 ± 0.008 |
| 9.505          | Malic acid                 | 0.080 ± 0.012** | 0.130 ± 0.028 | 0.089 ± 0.015*  | 0.115 ± 0.013 | 0.072 ± 0.012*  | 0.134 ± 0.052 |
| 9.927          | Proline                    | 0.136 ± 0.079   | 0.171 ± 0.065 | 0.160 ± 0.024** | 0.211 ± 0.022 | 0.133 ± 0.020*  | 0.207 ± 0.060 |
| 11.439         | Phenylalanine              | 0.015 ± 0.003*  | 0.039 ± 0.017 | 0.017 ± 0.003** | 0.039 ± 0.009 | 0.011 ± 0.001   | 0.015 ± 0.005 |
| 12.869         | $\alpha$ -Aminoadipic acid | 0.017 ± 0.007** | 0.004 ± 0.001 | 0.009 ± 0.002** | 0.032 ± 0.005 | 0.004 ± 0.001   | 0.010 ± 0.006 |
| 13.617         | Phosphoric acid            | 0.372 ± 0.156   | 0.219 ± 0.076 | 0.255 ± 0.008*  | 0.337 ± 0.067 | 0.243 ± 0.070   | 0.194 ± 0.081 |
| 14.584         | Citrate                    | 0.054 ± 0.037*  | 0.005 ± 0.005 | 0.141 ± 0.015** | 0.088 ± 0.031 | 0.142 ± 0.021*  | 0.227 ± 0.057 |
| 15.906         | Glucose                    | 0.996 ± 0.147** | 0.194 ± 0.182 | 2.379 ± 0.554*  | 1.472 ± 0.360 | 1.396 ± 0.997   | 1.605 ± 0.539 |
| 16.225         | Histidine                  | 0.225 ± 0.042** | 0.070 ± 0.033 | 0.541 ± 0.136*  | 0.365 ± 0.066 | 0.457 ± 0.197   | 0.394 ± 0.121 |
| 16.353         | Lysine                     | 0.087 ± 0.012** | 0.213 ± 0.036 | 0.071 ± 0.014** | 0.181 ± 0.025 | 0.040 ± 0.011   | 0.058 ± 0.024 |
| 16.611         | Tyrosine                   | 0.086 ± 0.010   | 0.043 ± 0.043 | 0.070 ± 0.014** | 0.098 ± 0.011 | 0.031 ± 0.008*  | 0.050 ± 0.016 |
| 18.259         | Unknown                    | 0.037 ± 0.007** | 0.009 ± 0.006 | 0.084 ± 0.023*  | 0.052 ± 0.012 | 0.062 ± 0.032   | 0.053 ± 0.019 |
| 18.539         | Hexadecanoic acid          | 0.075 ± 0.011   | 0.098 ± 0.036 | 0.084 ± 0.014** | 0.152 ± 0.019 | 0.056 ± 0.013   | 0.103 ± 0.043 |
| 20.173         | Unknown                    | 0.008 ± 0.005   | 0.018 ± 0.009 | 0.025 ± 0.005** | 0.054 ± 0.007 | 0.037 ± 0.007** | 0.066 ± 0.016 |
| 20.966         | Linolenic acid             | 0.032 ± 0.014*  | 0.122 ± 0.058 | 0.034 ± 0.005** | 0.121 ± 0.010 | 0.036 ± 0.011   | 0.068 ± 0.031 |
| 21.317         | Linoleic acid              | 0.644 ± 0.241** | 0.167 ± 0.072 | 0.434 ± 0.093** | 0.255 ± 0.020 | 0.171 ± 0.063   | 0.154 ± 0.043 |
| 21.423         | Linolenic acid             | 1.213 ± 0.488** | 0.162 ± 0.065 | 0.727 ± 0.148** | 0.214 ± 0.032 | 0.304 ± 0.114*  | 0.141 ± 0.085 |
| 21.909         | Octadecanoic acid          | 0.107 ± 0.018   | 0.135 ± 0.041 | 0.095 ± 0.013** | 0.209 ± 0.030 | 0.072 ± 0.011   | 0.130 ± 0.047 |

|        |                    |                 |               |                 |               |                |               |
|--------|--------------------|-----------------|---------------|-----------------|---------------|----------------|---------------|
| 24.569 | Myo-Inositol       | 0.032 ± 0.008   | 0.036 ± 0.010 | 0.033 ± 0.008** | 0.066 ± 0.010 | 0.019 ± 0.006  | 0.030 ± 0.010 |
| 26.755 | Unknown            | 0.006 ± 0.004** | 0.044 ± 0.014 | 0.008 ± 0.009** | 0.036 ± 0.008 | 0.003 ± 0.003  | 0.004 ± 0.009 |
| 27.975 | Adenosine          | 0.074 ± 0.017** | 0.024 ± 0.013 | 0.162 ± 0.027   | 0.140 ± 0.031 | 0.115 ± 0.019  | 0.136 ± 0.033 |
| 30.943 | Tetracosanoic acid | 0.005 ± 0.006   | 0.012 ± 0.007 | 0.012 ± 0.009*  | 0.027 ± 0.003 | 0.013 ± 0.003* | 0.027 ± 0.010 |
| 35.750 | ergosterol         | 0.293 ± 0.200   | 0.359 ± 0.159 | 0.207 ± 0.010** | 0.390 ± 0.044 | 0.182 ± 0.059  | 0.263 ± 0.059 |
| 36.521 | Unknown            | 0.038 ± 0.050*  | 0.107 ± 0.042 | 0.035 ± 0.022   | 0.075 ± 0.036 | 0.026 ± 0.019* | 0.055 ± 0.014 |
| 37.206 | Unknown            | 0.022 ± 0.021   | 0.034 ± 0.017 | 0.021 ± 0.006   | 0.039 ± 0.018 | 0.010 ± 0.006* | 0.022 ± 0.005 |
| 38.708 | Unknown            | 0.003 ± 0.005** | 0.022 ± 0.010 | 0.001 ± 0.003*  | 0.034 ± 0.020 | 0.003 ± 0.004* | 0.014 ± 0.009 |

Note: the VIP values of all the metabolites are greater than 1. The values are means of five independent experiments. The data represent the relative peak intensity and are presented as the mean ± SEM.

\* means significantly different ( $P < 0.05$ ) and \*\* means great significantly different ( $P < 0.01$ ).
